# Supplementary material for: Alginate–lavender nanofibers with antibacterial and anti-inflammatory activity to effectively promote burn healing
Source: Royal Society of Chemistry journal article supplement (doi:10.1039/c5tb02174j), 2016-01-01
Supplement: c5tb02174j1.pdf [file c5tb02174j1.pdf]

## Supplementary Information

### **Alginate-lavender nanofibers with antibacterial and anti-inflammatory activity to effectively promote burn healing**

*Hadi Hajiali*<sup>\*a,b</sup>, *Maria Summa*<sup>c</sup>, *Debora Russo*<sup>c</sup>, *Andrea Armirotti*<sup>c</sup>, *Virgilio Brunetti*<sup>d</sup>,  
*Rosalia Bertorelli*<sup>c</sup>, *Athanassia Athanassiou*<sup>\*a</sup>, *Elisa Mele*<sup>\*a,e</sup>

<sup>a</sup> Smart Materials, Istituto Italiano di Tecnologia, via Morego 30, 16163 Genoa, Italy.

<sup>b</sup> DIBRIS, University of Genoa, via Opera Pia 13, 16145, Genoa, Italy.

<sup>c</sup> PharmaChemistry, Drug Discovery and Development, Istituto Italiano di Tecnologia, Via Morego 30, 16163, Genoa, Italy.

<sup>d</sup> Center for Biomolecular Nanotechnologies, Istituto Italiano di Tecnologia @UniLe, Via Barsanti, 73010 Arnesano, Lecce, Italy

\* Corresponding authors:

Hadi.Hajiali@iit.it

Athanassia.Athanassiou@iit.it

E.Mele2@lboro.ac.uk

<sup>e</sup> Current Address: Department of Materials, Loughborough University, Loughborough, LE11 3TU, United Kingdom

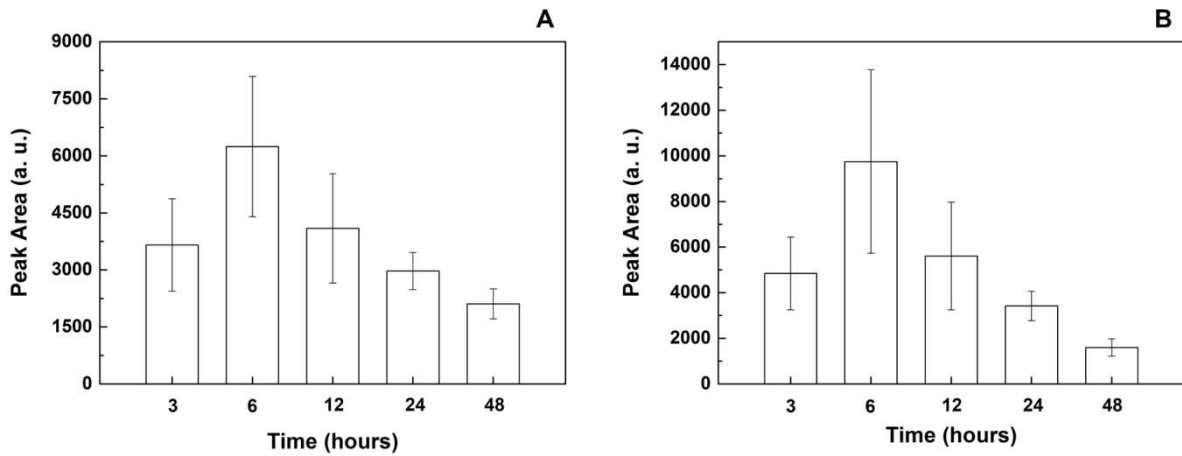

**Figure S1.** Release profile of caryophyllene (A) and caryophyllene oxide (B) from SA-PEO/LO nanofibers at 3, 6, 12, 24, and 48 hours.

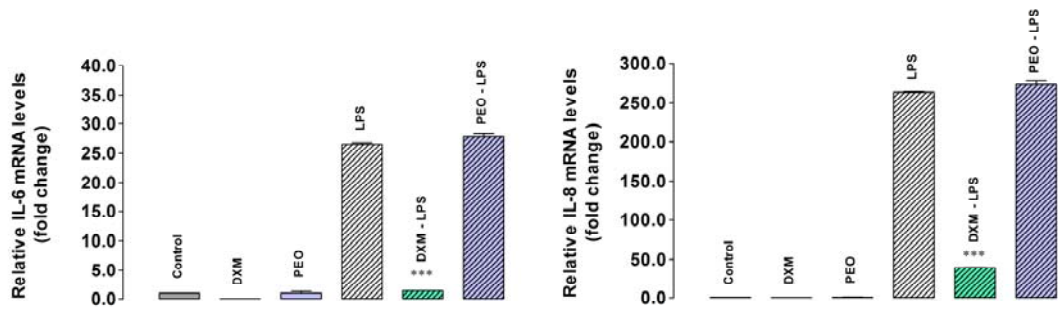

**Figure S2.** Histograms showing the mean values of mRNA levels of IL-6 and IL-8 for HFF-1 cells treated with pure PEO nanofibers. The first 3 bars in each panel are the control samples. Data are expressed as average  $\pm$  S.E.M. (\*\*\*)  $p < 0.001$  vs. LPS group). The graphs are representative of three independent experiments, each performed in three technical replicates.

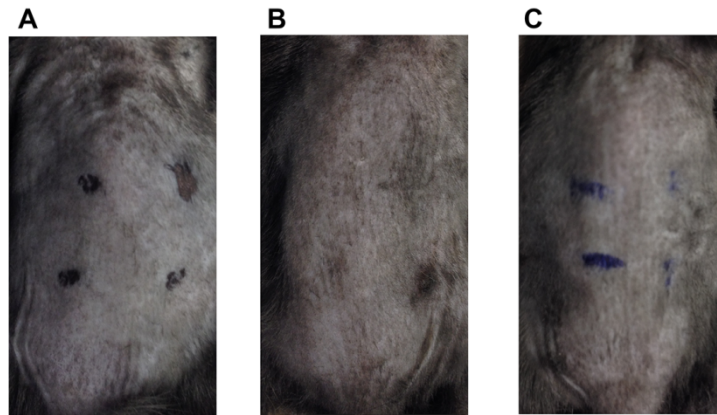

**Figure S3:** Representative photographs of the skin of mice immediately after the UVB exposure (0 h): untreated (A), and before the treatment with the alginate-based dressings without (B) and with lavender oil (C).

**Table S1:** *In-vivo* experiments on the expression of IL-6 for animals treated without any cutaneous treatment, SA-PEO and SA-PEO/LO nanofibers, and Tegaderm dressing after 6, 24, 32, 48, and 96 hours from the UVB burn. Data are expressed as mean  $\pm$  S.E.M. \*\*\*  $p < 0.001$  vs. UVB irradiated group

| Time point (hour) | IL-6(pg/mg protein) |                          |                             |                          |
|-------------------|---------------------|--------------------------|-----------------------------|--------------------------|
|                   | UV-B / No dressing  | UV-B / SA-PEO nanofibers | UV-B / SA-PEO/LO nanofibers | UV-B / Tegaderm dressing |
| 6                 | 41.3 $\pm$ 4.4      | 50.8 $\pm$ 10.4          | 22.7 $\pm$ 4.1              | 82.5 $\pm$ 7.6           |
| 24                | 118.2 $\pm$ 27.1    | 45.3 $\pm$ 4.8           | 39.8 $\pm$ 6.3              | 55.8 $\pm$ 5.6           |
| 32                | 194.0 $\pm$ 42.7    | 19.6 $\pm$ 3.9           | 29.6 $\pm$ 5.3              | 52.1 $\pm$ 7.3           |
| 48                | 714.3 $\pm$ 81.2    | 121.0 $\pm$ 30.9***      | 99.5 $\pm$ 7.5***           | 77.1 $\pm$ 4.1***        |
| 96                | 94.4 $\pm$ 45.5     | 37.7 $\pm$ 4.9           | 30.4 $\pm$ 4.6              | 46.3 $\pm$ 10.0          |

**Table S2:** *In-vivo* experiments on the expression of IL-1 $\beta$  for animals treated without any cutaneous treatment, SA-PEO and SA-PEO/LO nanofibers, and Tegaderm dressing after 6, 24, 32, 48, and 96 hours from the UVB burn. Data are expressed as mean  $\pm$  S.E.M. \*  $p < 0.05$ ; \*\*  $p < 0.01$  and \*\*\*  $p < 0.001$  vs. UVB irradiated group

| Time point (hour) | IL-1 $\beta$ (pg/mg protein) |                          |                             |                          |
|-------------------|------------------------------|--------------------------|-----------------------------|--------------------------|
|                   | UV-B / No dressing           | UV-B / SA-PEO nanofibers | UV-B / SA-PEO/LO nanofibers | UV-B / Tegaderm dressing |
| 6                 | 9.6 $\pm$ 4.4                | 22.6 $\pm$ 10.4          | 12.8 $\pm$ 5.1              | 72.0 $\pm$ 8.7           |
| 24                | 104.1 $\pm$ 39.4             | 10.8 $\pm$ 7.1**         | 22.4 $\pm$ 10.9*            | 50.3 $\pm$ 23.6*         |
| 32                | 109.0 $\pm$ 10.5             | 18.1 $\pm$ 9.2**         | 27.6 $\pm$ 11.4**           | 87.1 $\pm$ 15.4          |
| 48                | 461.6 $\pm$ 54.1             | 26.8 $\pm$ 13.6***       | 18.6 $\pm$ 10.1***          | 79.8 $\pm$ 16.7***       |
| 96                | 87.6 $\pm$ 28.8              | 7.4 $\pm$ 3.2**          | 24.9 $\pm$ 10.6*            | 38.9 $\pm$ 18.9          |

**Table S3:** *In-vivo* experiments on the expression of TNF- $\alpha$  for animals treated without any cutaneous treatment, SA-PEO and SA-PEO/LO nanofibers, and Tegaderm dressing after 6, 24, 32, 48, and 96 hours from the UVB burn. Data are expressed as mean  $\pm$  S.E.M. \*\*\*  $p < 0.001$  vs. UVB irradiated group

| Time point (hour) | TNF- $\alpha$ (pg/mg protein) |                          |                             |                          |
|-------------------|-------------------------------|--------------------------|-----------------------------|--------------------------|
|                   | UV-B / No dressing            | UV-B / SA-PEO nanofibers | UV-B / SA-PEO/LO nanofibers | UV-B / Tegaderm dressing |
| 6                 | 1.5 $\pm$ 0.2                 | 0.8 $\pm$ 0.1            | 0.8 $\pm$ 0.3               | 1.6 $\pm$ 0.3            |
| 24                | 33.7 $\pm$ 14.8               | 4.4 $\pm$ 2.5            | 10.1 $\pm$ 4.3              | 0.6 $\pm$ 0.3            |
| 32                | 3.2 $\pm$ 1.1                 | 0.4 $\pm$ 0.1            | 2.1 $\pm$ 1.0               | 3.0 $\pm$ 0.4            |
| 48                | 113.4 $\pm$ 35.3              | 5.8 $\pm$ 4.9***         | 7.6 $\pm$ 3.1***            | 2.3 $\pm$ 0.6***         |
| 96                | 7.1 $\pm$ 2.0                 | 2.7 $\pm$ 0.7            | 5.8 $\pm$ 1.0               | 5.7 $\pm$ 1.5            |
